# Supplementary material for: NiIINPs entrapped within a matrix ofl-glutamic acid cross-linked chitosan supported on magnetic carboxylic acid-functionalized multi-walled carbon nanotube: a new and efficient multi-task catalytic system for the green one-pot synthesis of diverse heterocyclic frameworks
Source: Royal Society of Chemistry journal article supplement (doi:10.1039/d1ra08454b), 2022-01-01

# Supplementary Information

**Ni<sup>II</sup> NPs entrapped within a matrix of *L*-glutamic acid cross-linked chitosan supported on magnetic carboxylic acid-functionalized multi-walled carbon nanotube: A new and efficient multi-task catalytic system for the green one-pot synthesis of diverse heterocyclic frameworks**

Morteza Hasanpour Galehban, Behzad Zeynizadeh, and Hossein Mousavi\*

Department of Organic Chemistry, Faculty of Chemistry, Urmia University, Urmia, Iran

E-mail: [hossein.mousavi@gmail.com](mailto:hossein.mousavi@gmail.com)

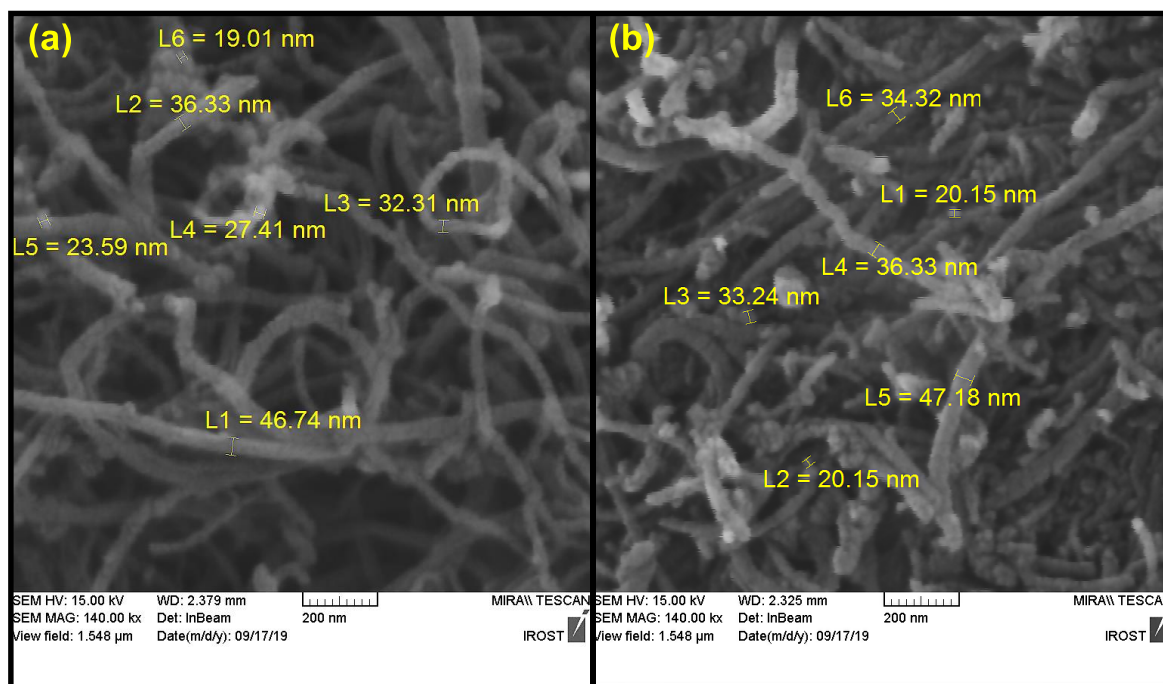

**Figure S1.** SEM images of (a) *f*-MWCNT and (b) Fe<sub>3</sub>O<sub>4</sub>/*f*-MWCNT.

## S2.1. FT-IR spectrum of 3,3'-(phenylmethylene)bis(4-hydroxy-2H-chromen-2-one)

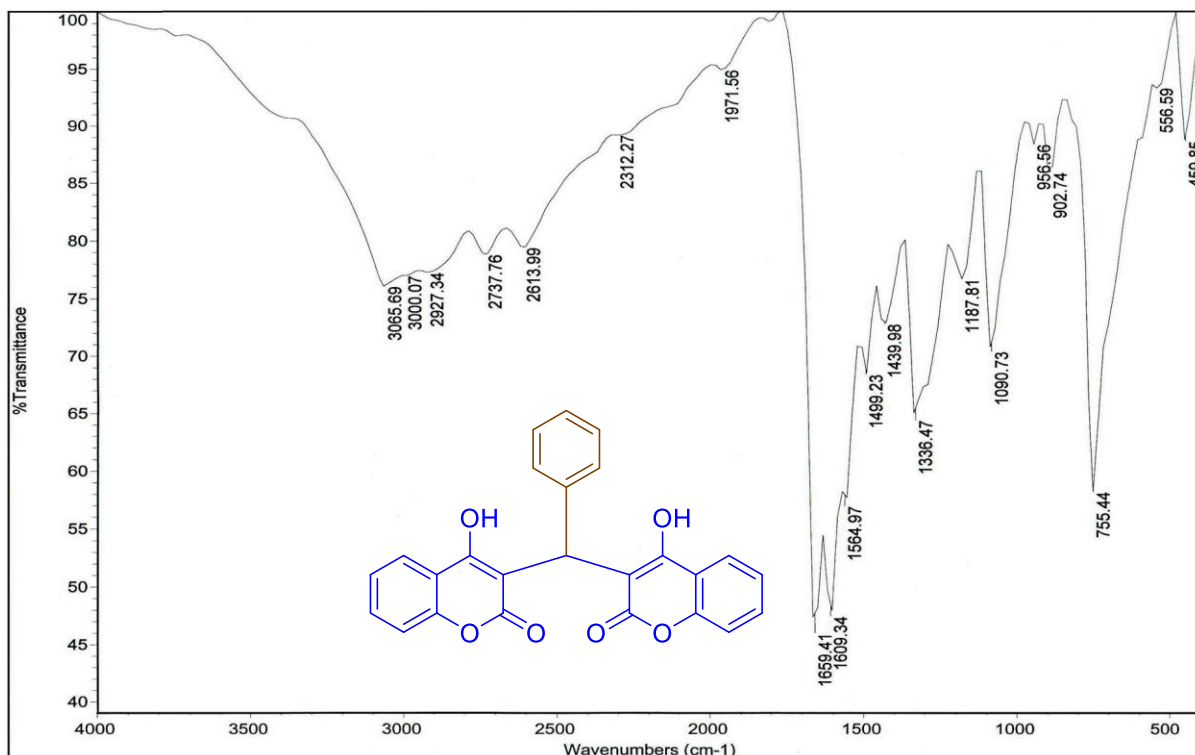

## S2.2. <sup>1</sup>H NMR (300 MHz) spectrum of 3,3'-(phenylmethylene)bis(4-hydroxy-2H-chromen-2-one)

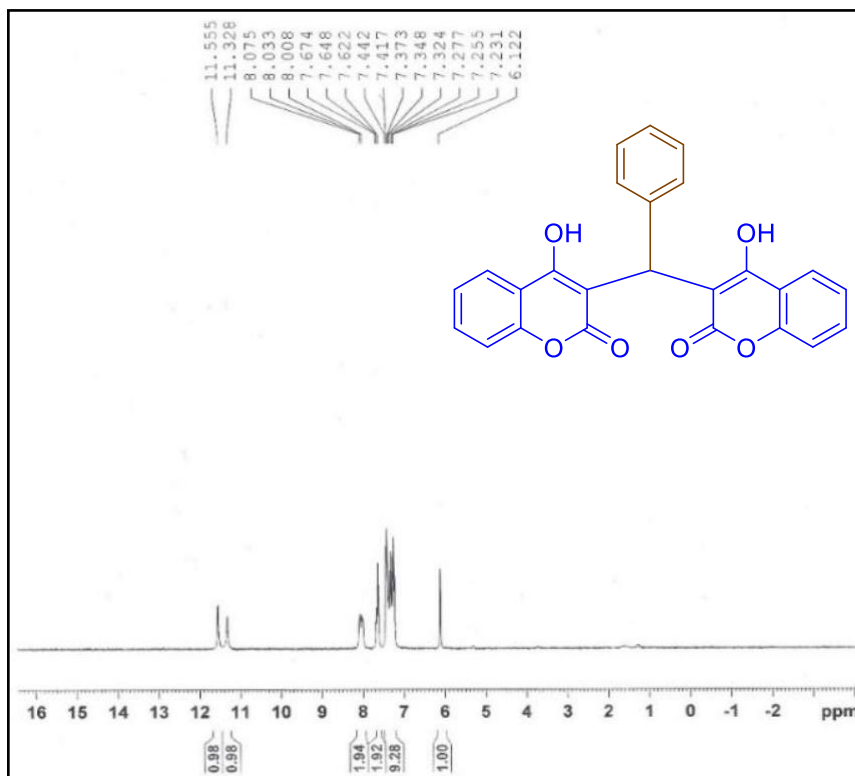

**S2.3. FT-IR spectrum of 3,3'-((4-chlorophenyl)methylene)bis(4-hydroxy-2H-chromen-2-one)**

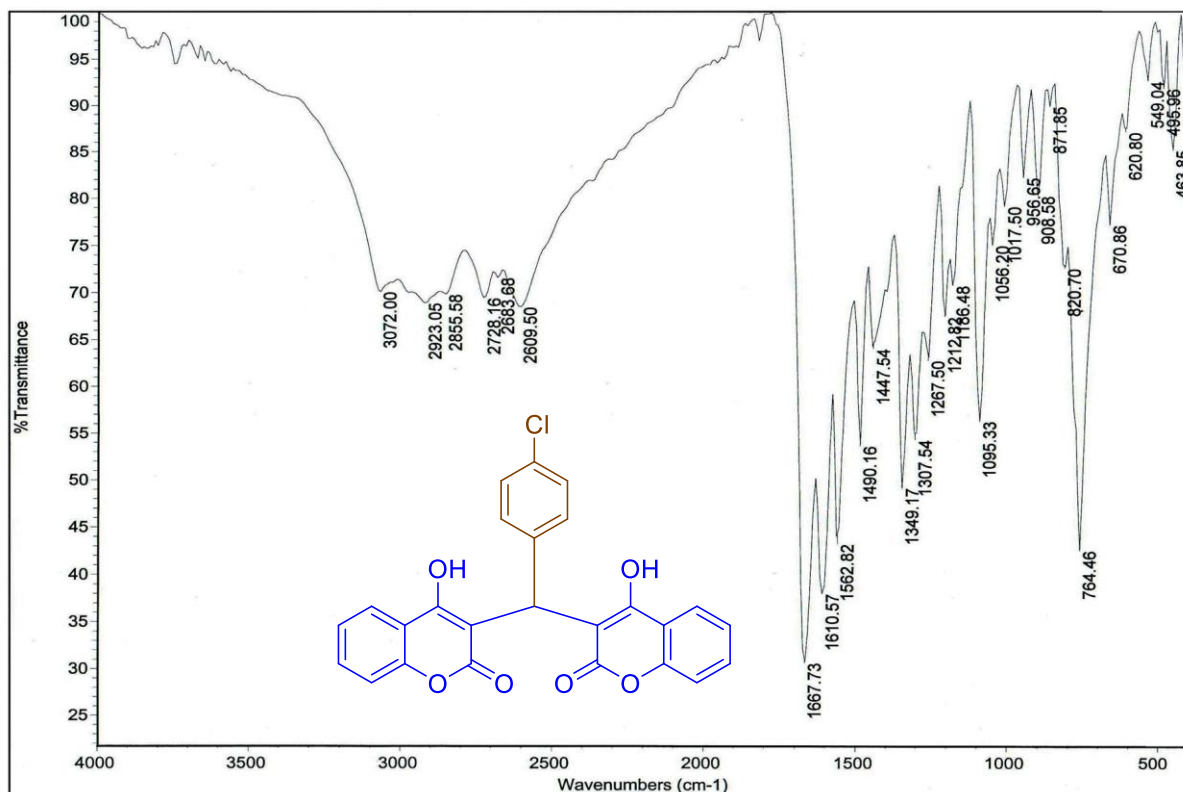

**S2.4.  $^1\text{H}$  NMR (300 MHz) spectrum of 3,3'-((4-chlorophenyl)methylene)bis(4-hydroxy-2H-chromen-2-one)**

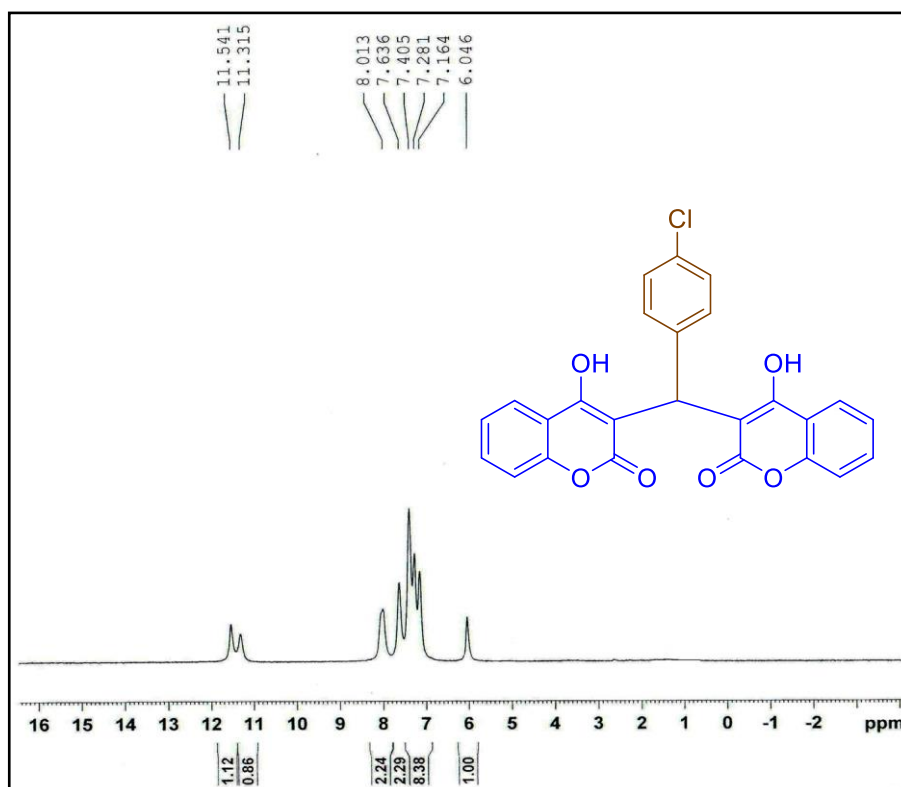

**S2.5. FT-IR spectrum of 3,3'-((4-nitrophenyl)methylene)bis(4-hydroxy-2H-chromen-2-one)**

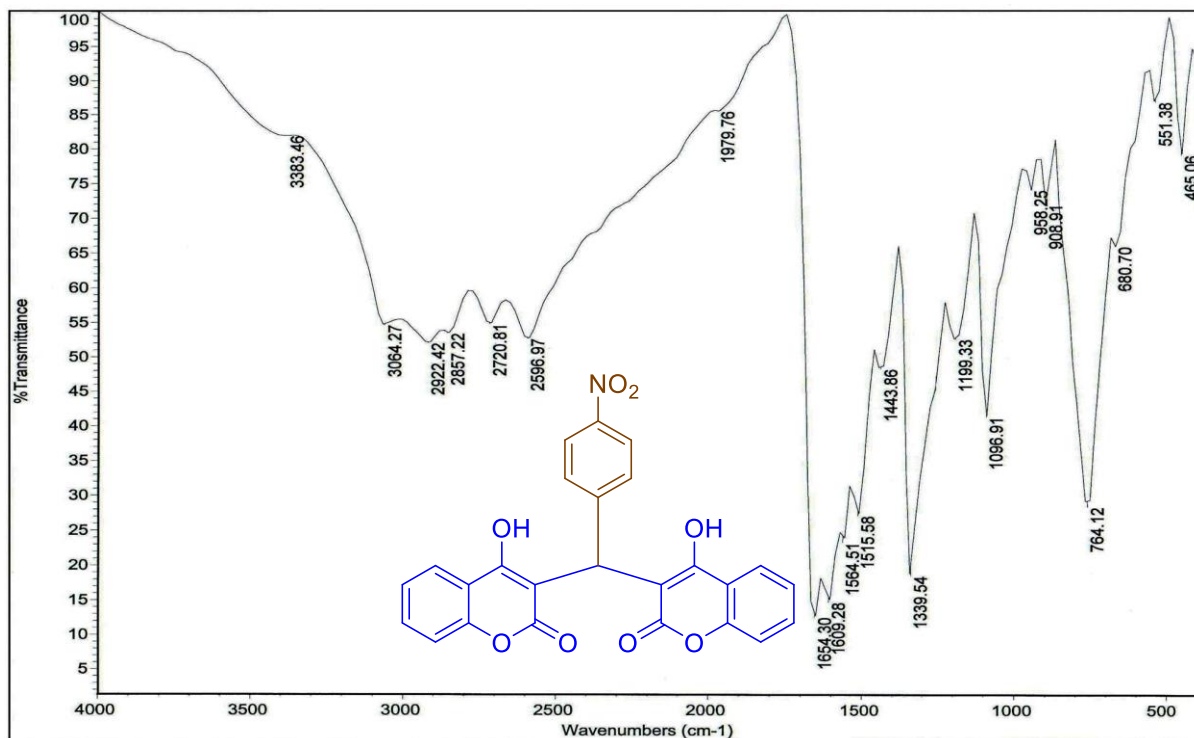

**S2.6.  $^1\text{H}$  NMR (300 MHz) spectrum of 3,3'-((4-nitrophenyl)methylene)bis(4-hydroxy-2H-chromen-2-one)**

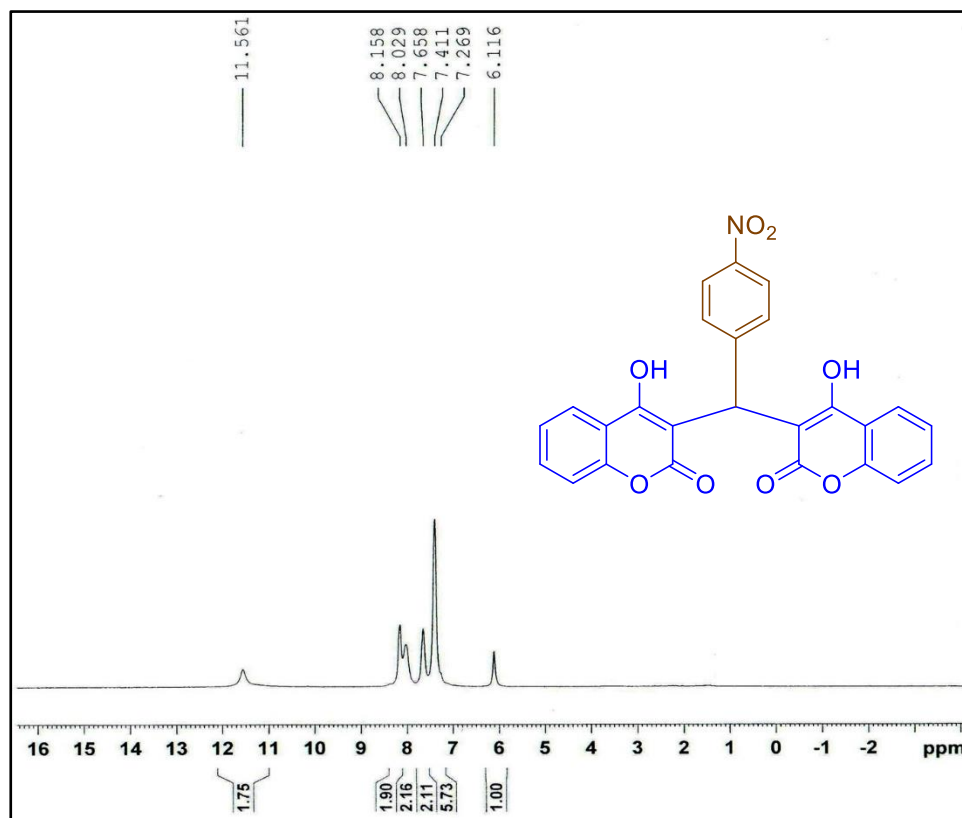

**S2.7. FT-IR spectrum of 3,3'-(*p*-tolylmethylene)bis(4-hydroxy-2*H*-chromen-2-one)**

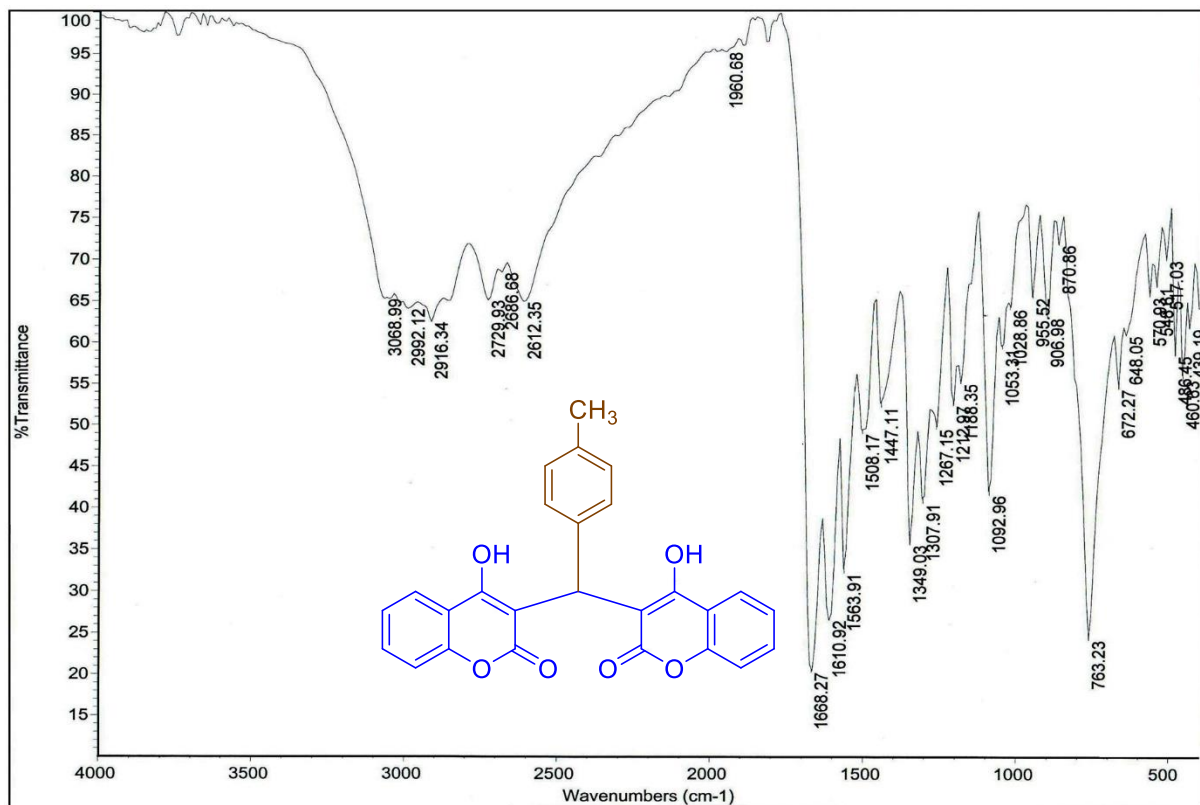

**S2.8. <sup>1</sup>H NMR (300 MHz) spectrum of 3,3'-(*p*-tolylmethylene)bis(4-hydroxy-2*H*-chromen-2-one)**

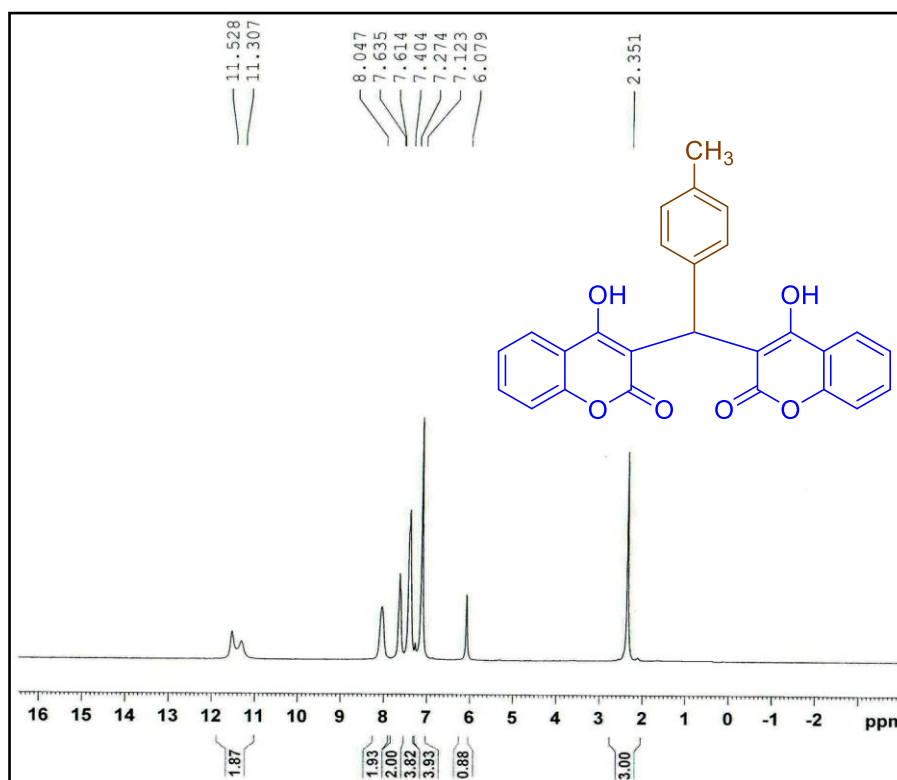

S2.9. FT-IR spectrum of 3,3'-((4-methoxyphenyl)methylene)bis(4-hydroxy-2H-chromen-2-one)

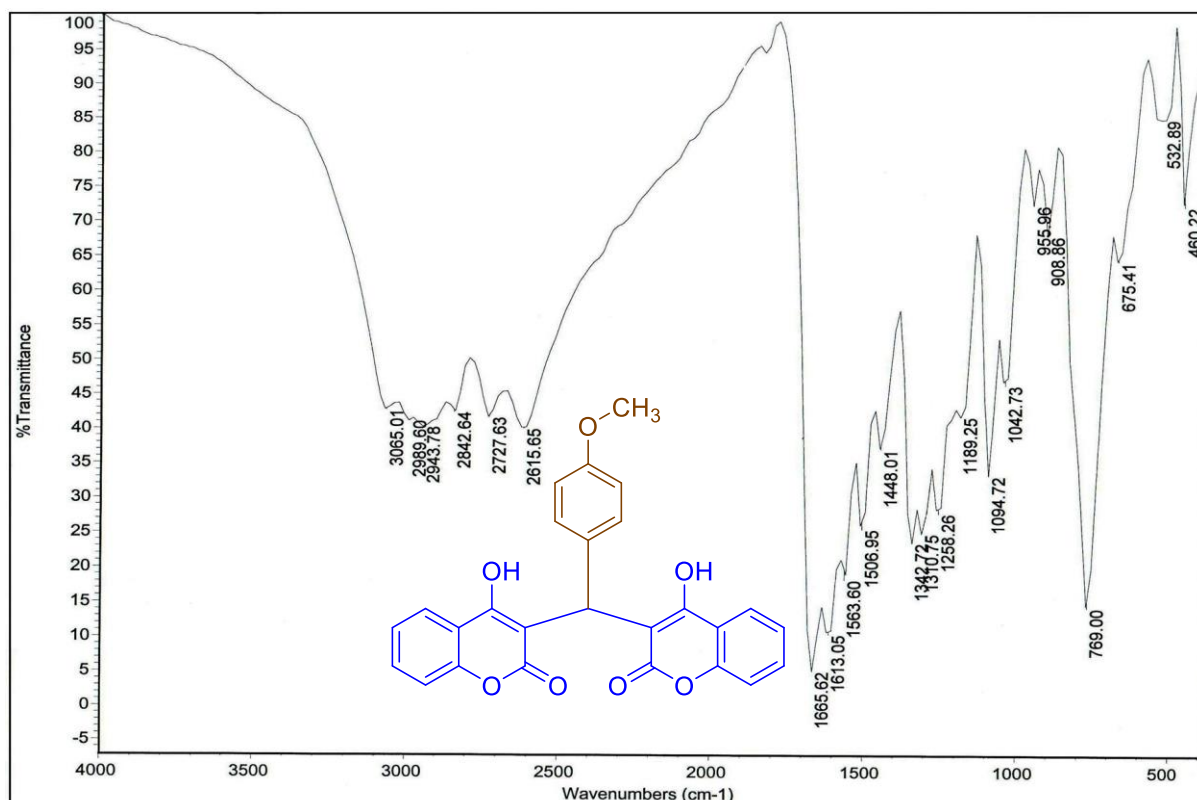

S2.10.  $^1\text{H}$  NMR (300 MHz) spectrum of 3,3'-((4-methoxyphenyl)methylene)bis(4-hydroxy-2H-chromen-2-one)

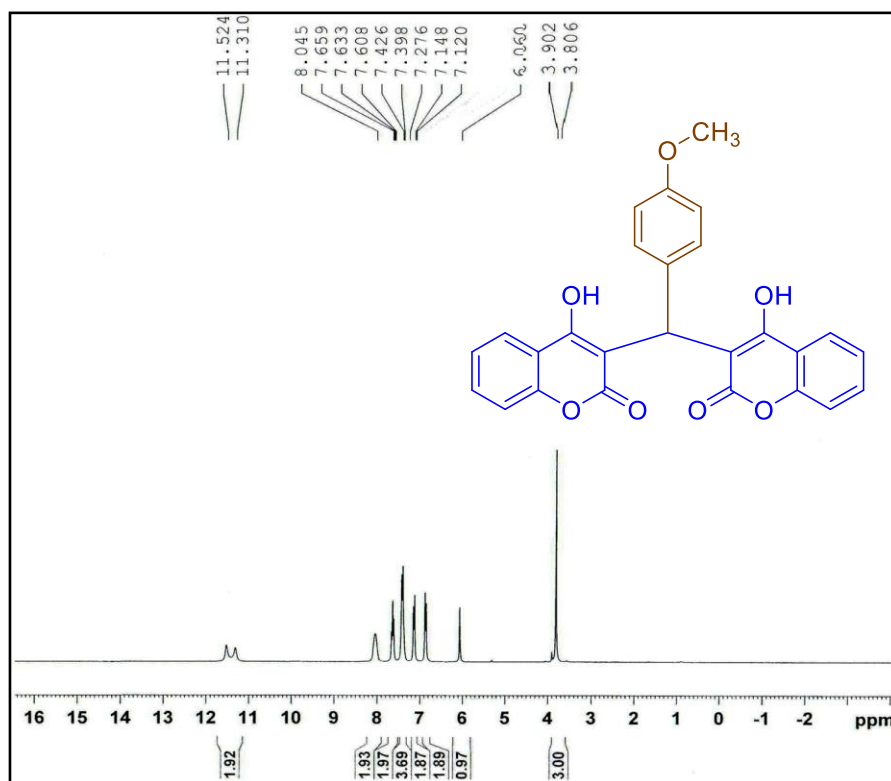

**S2.11. FT-IR spectrum of 2-(4-chloro-3-nitrophenyl)-2,3-dihydroquinazolin-4(1*H*)-one**

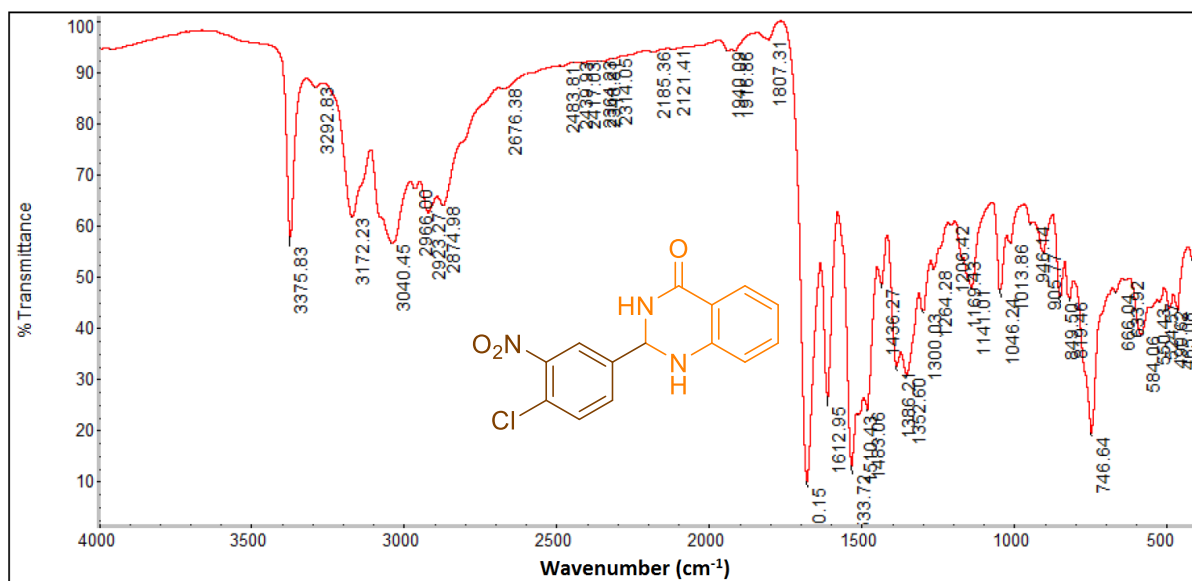

**S2.12. <sup>1</sup>H NMR (400 MHz) spectrum of 2-(4-chloro-3-nitrophenyl)-2,3-dihydroquinazolin-4(1*H*)-one**

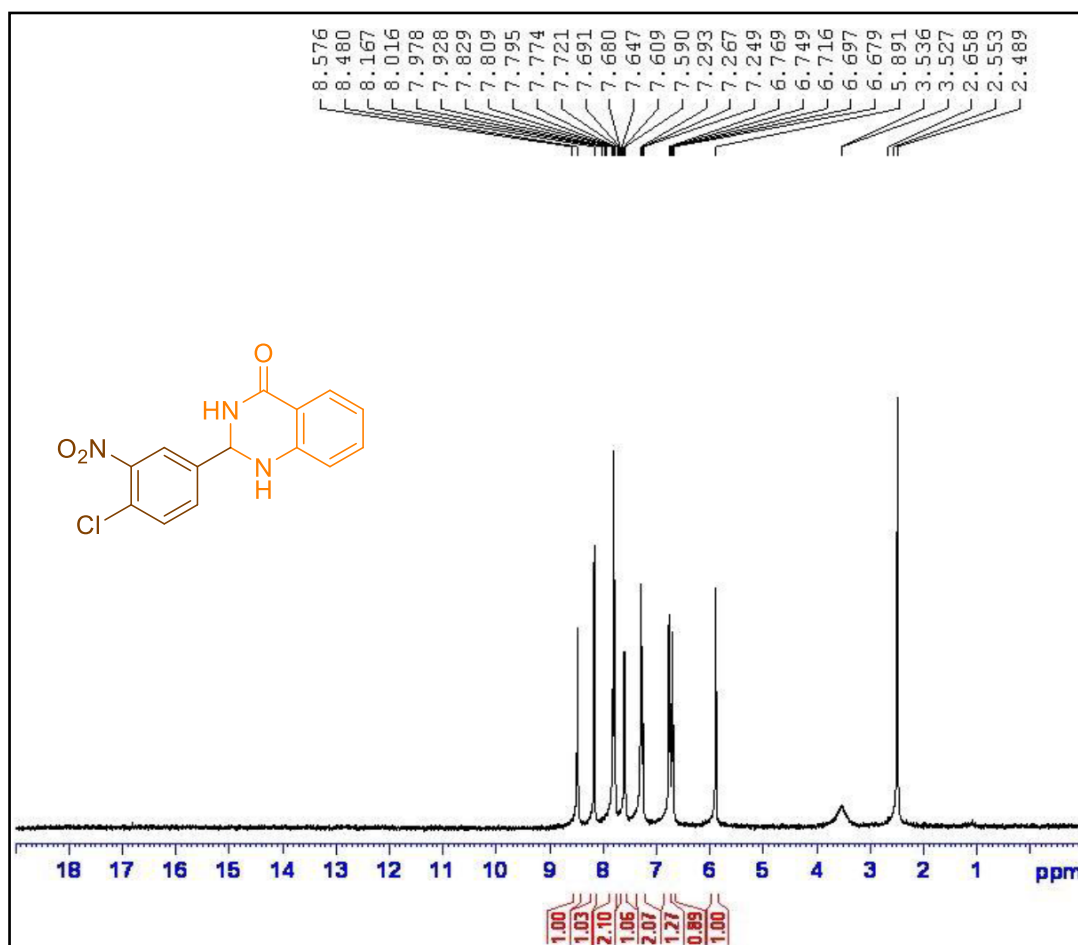

S2.13. FT-IR spectrum of 3,3,6,6-tetramethyl-9-(3-nitrophenyl)-3,4,5,6,7,9-hexahydro-1H-xanthene-1,8(2H)-dione

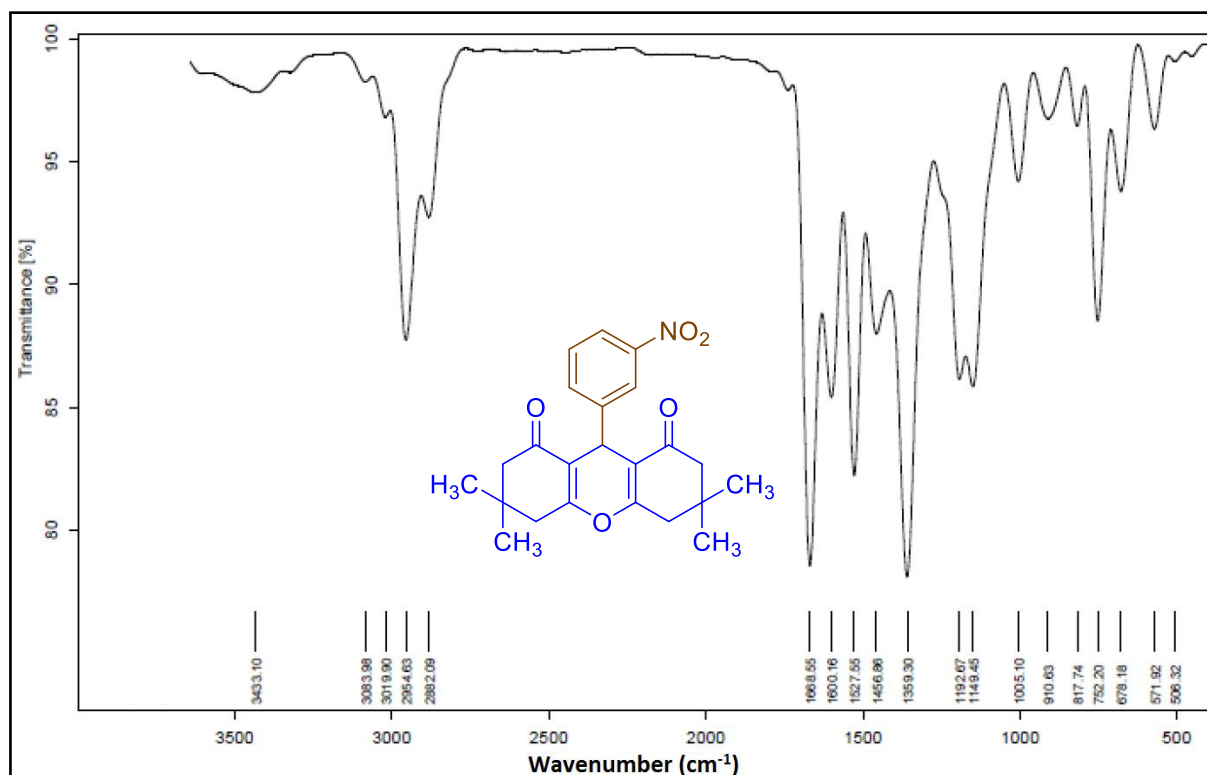

S2.14. <sup>1</sup>H NMR (300 MHz) spectrum of 3,3,6,6-tetramethyl-9-(3-nitrophenyl)-3,4,5,6,7,9-hexahydro-1H-xanthene-1,8(2H)-dione

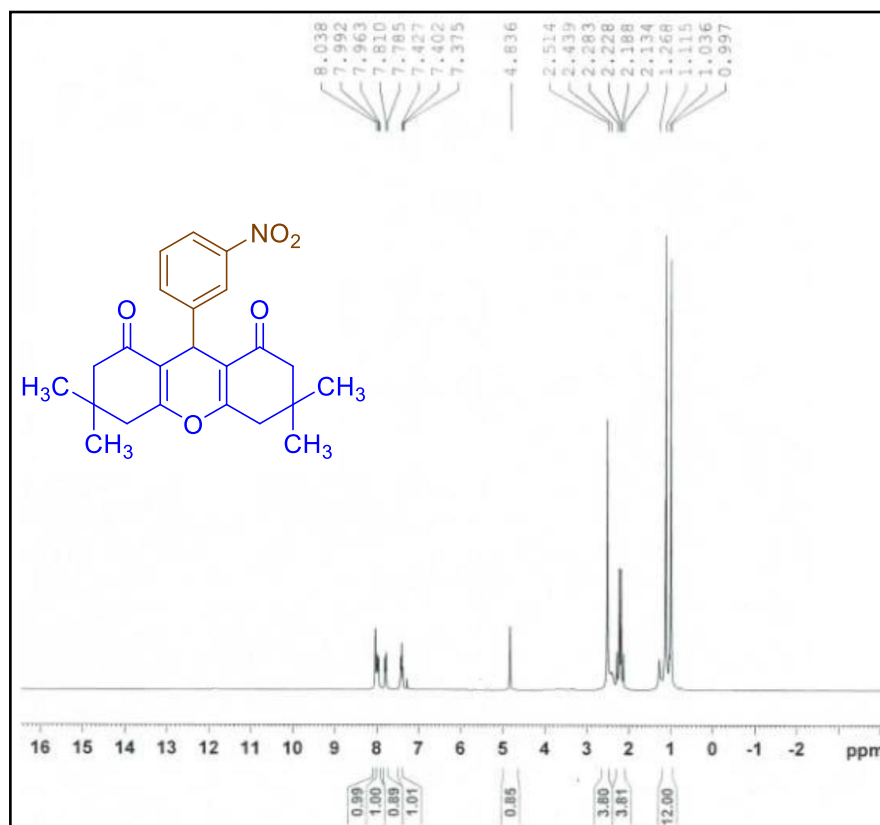



**S2.15. FT-IR spectrum of 9-(2-chlorophenyl)-3,3,6,6-tetramethyl-3,4,5,6,7,9-hexahydro-1H-xanthene-1,8(2H)-dione**

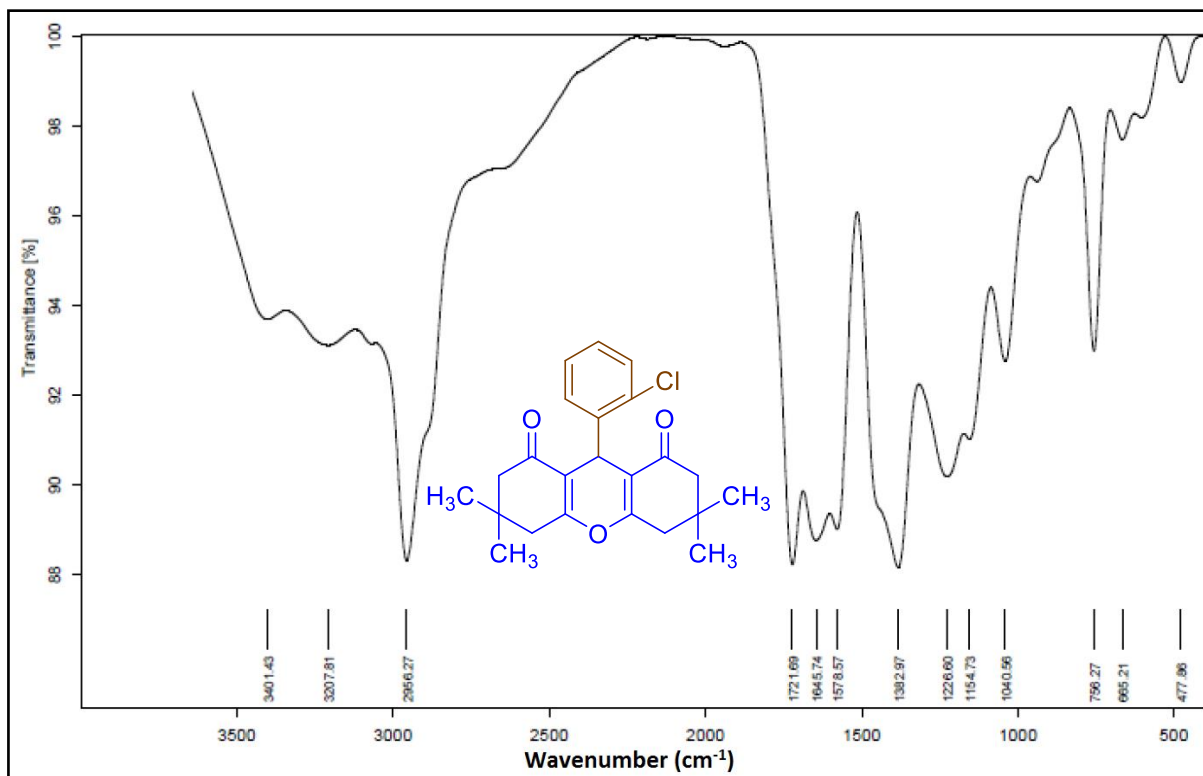

**S2.16. <sup>1</sup>H NMR (300 MHz) spectrum of 9-(2-chlorophenyl)-3,3,6,6-tetramethyl-3,4,5,6,7,9-hexahydro-1H-xanthene-1,8(2H)-dione**

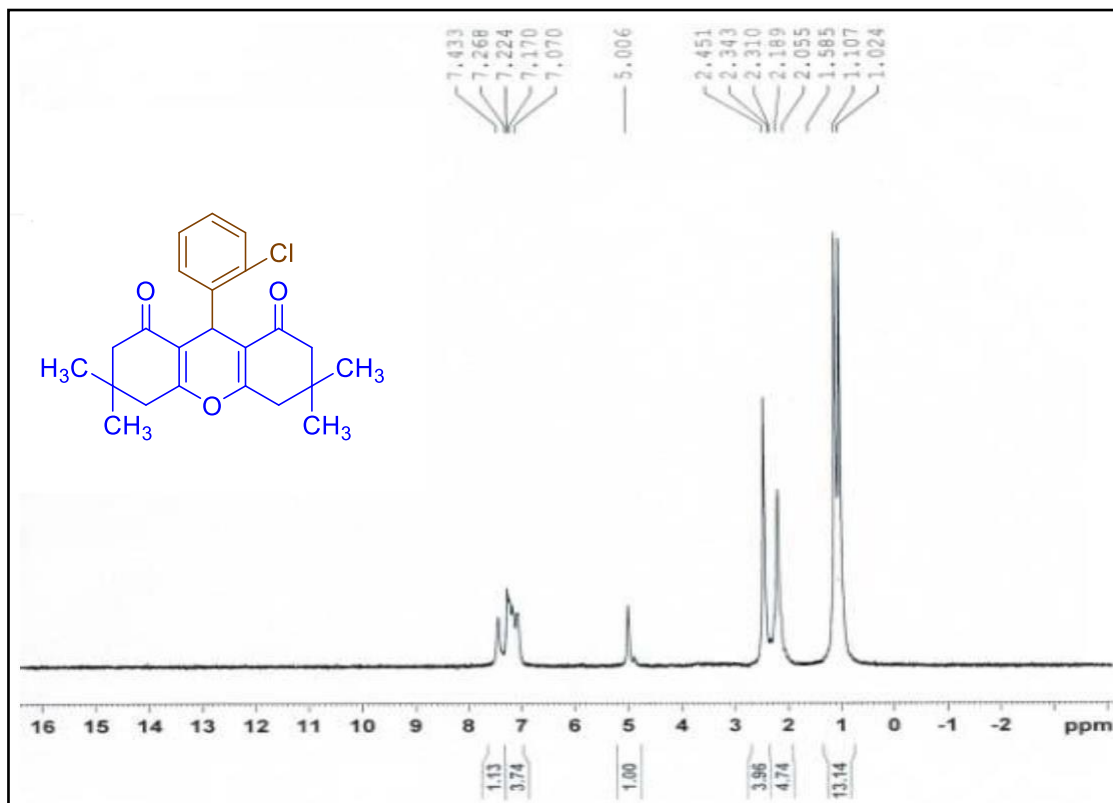

**S2.17. FT-IR spectrum of 2-amino-7,7-dimethyl-5-oxo-4-phenyl-5,6,7,8-tetrahydro-4H-chromene-3-carbonitrile**

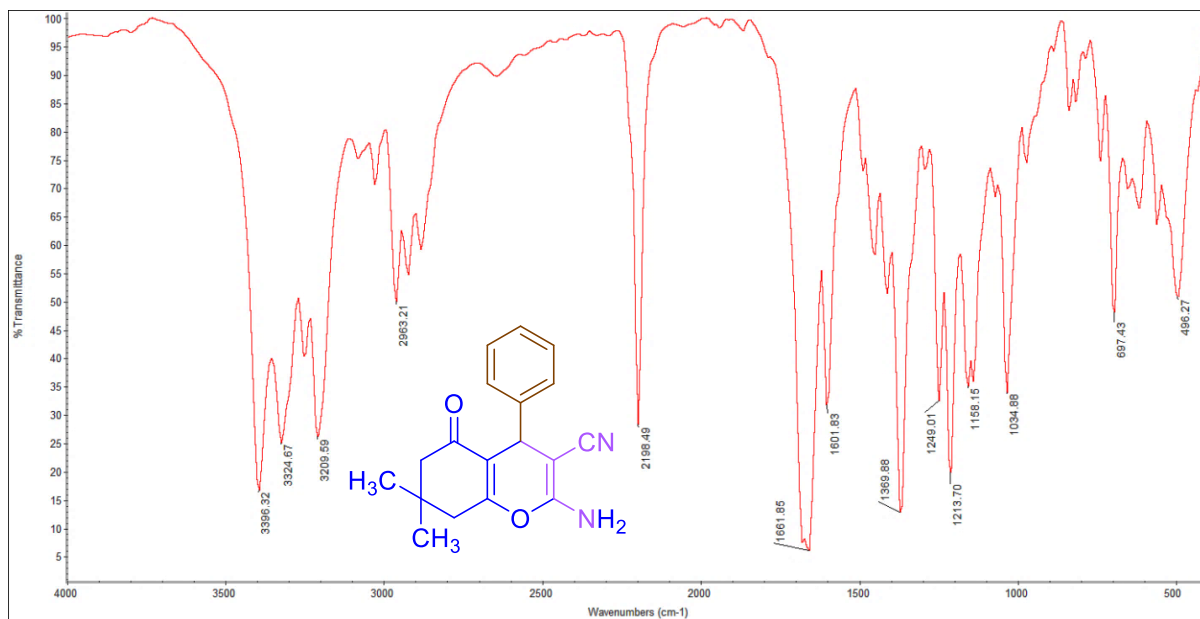

**S2.18. <sup>1</sup>H NMR (400 MHz) spectrum of 2-amino-7,7-dimethyl-5-oxo-4-phenyl-5,6,7,8-tetrahydro-4H-chromene-3-carbonitrile**

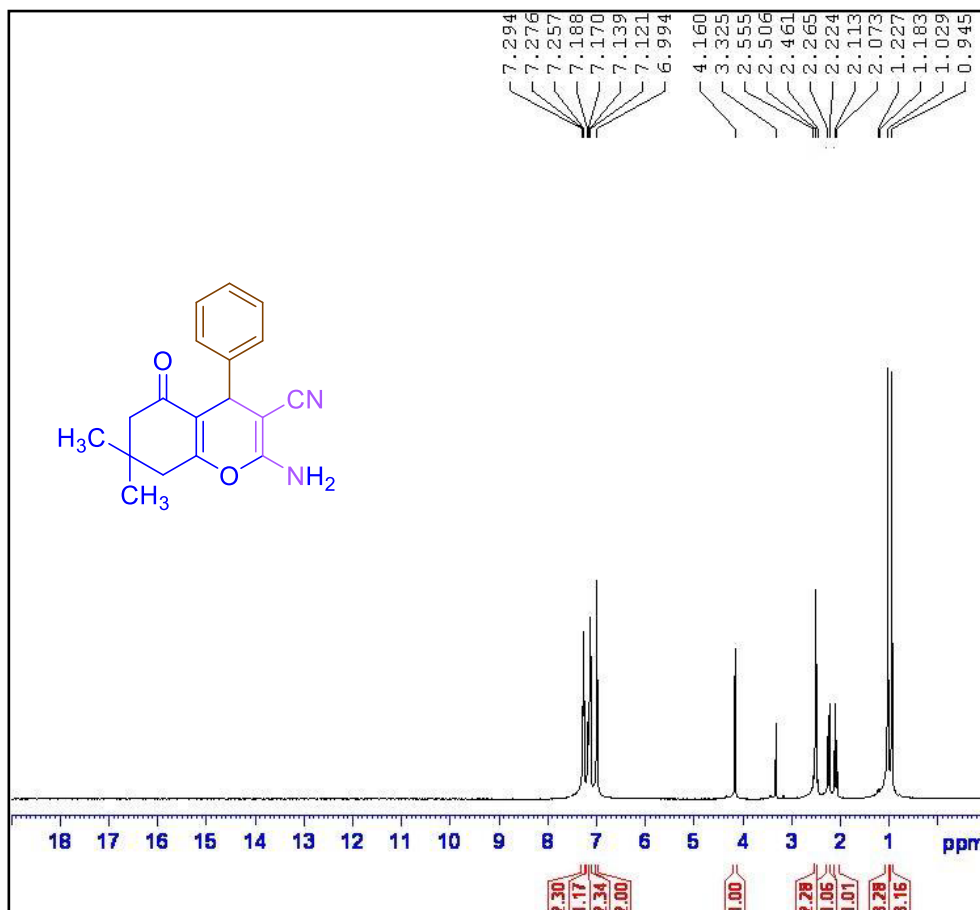

**S2.19. FT-IR spectrum of 2-amino-4-(4-chlorophenyl)-7,7-dimethyl-5-oxo-5,6,7,8-tetrahydro-4H-chromene-3-carbonitrile**

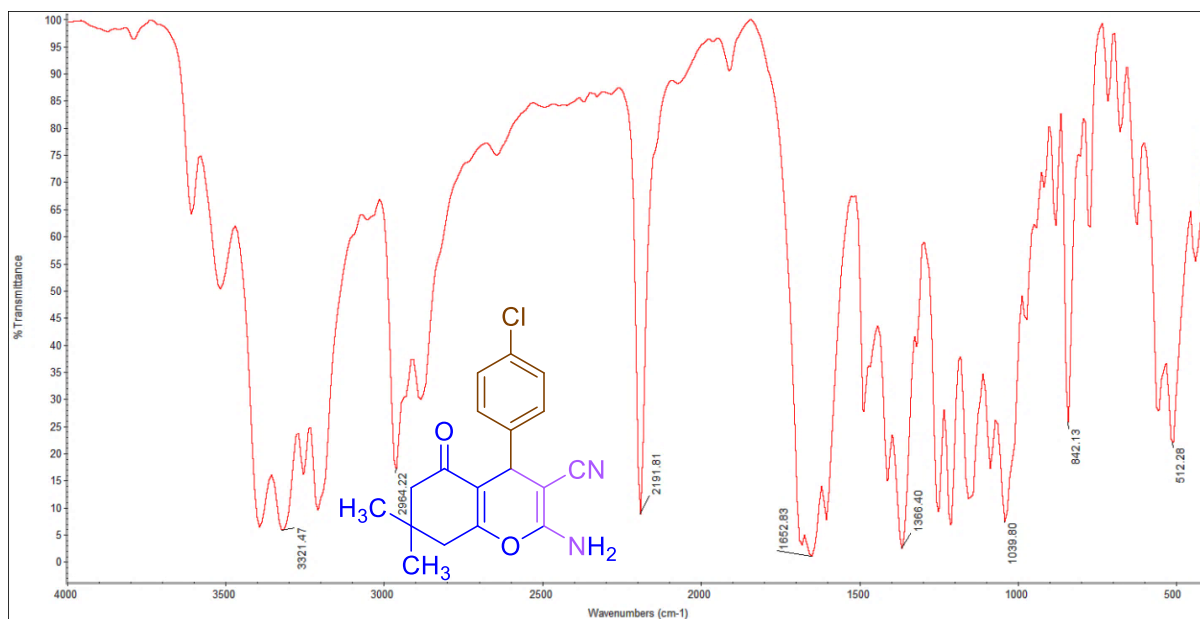

**S2.20. <sup>1</sup>H NMR (400 MHz) spectrum of 2-amino-4-(4-chlorophenyl)-7,7-dimethyl-5-oxo-5,6,7,8-tetrahydro-4H-chromene-3-carbonitrile**

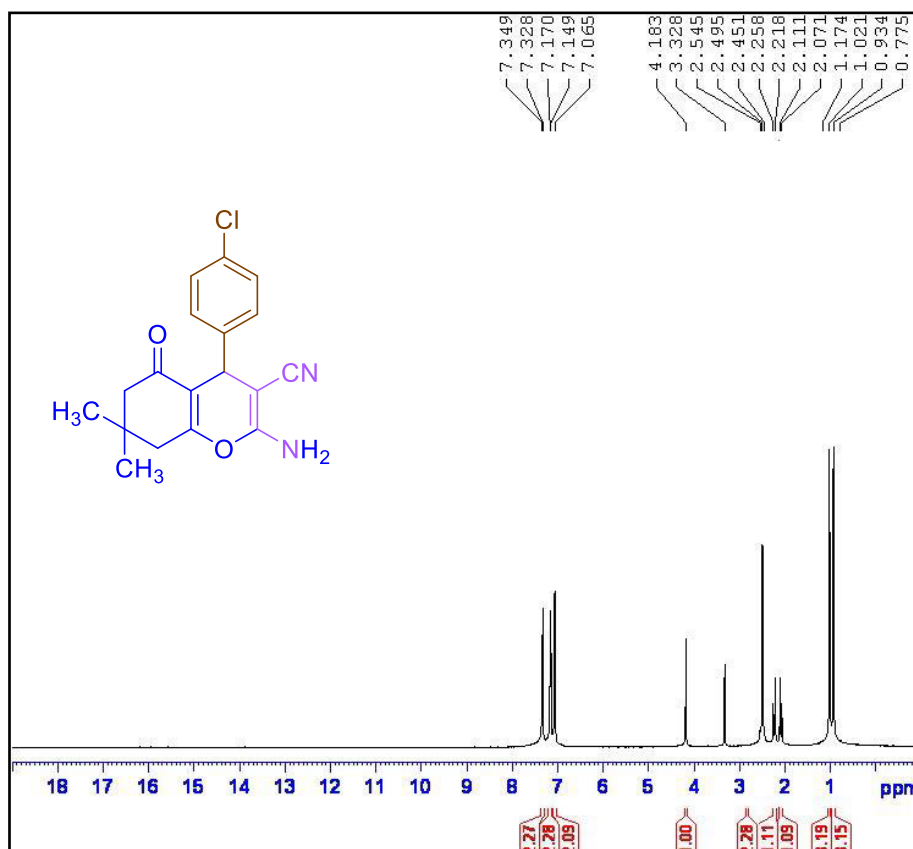

**S2.21. FT-IR spectrum of 2-amino-7,7-dimethyl-4-(4-nitrophenyl)-5-oxo-5,6,7,8-tetrahydro-4H-chromene-3-carbonitrile**

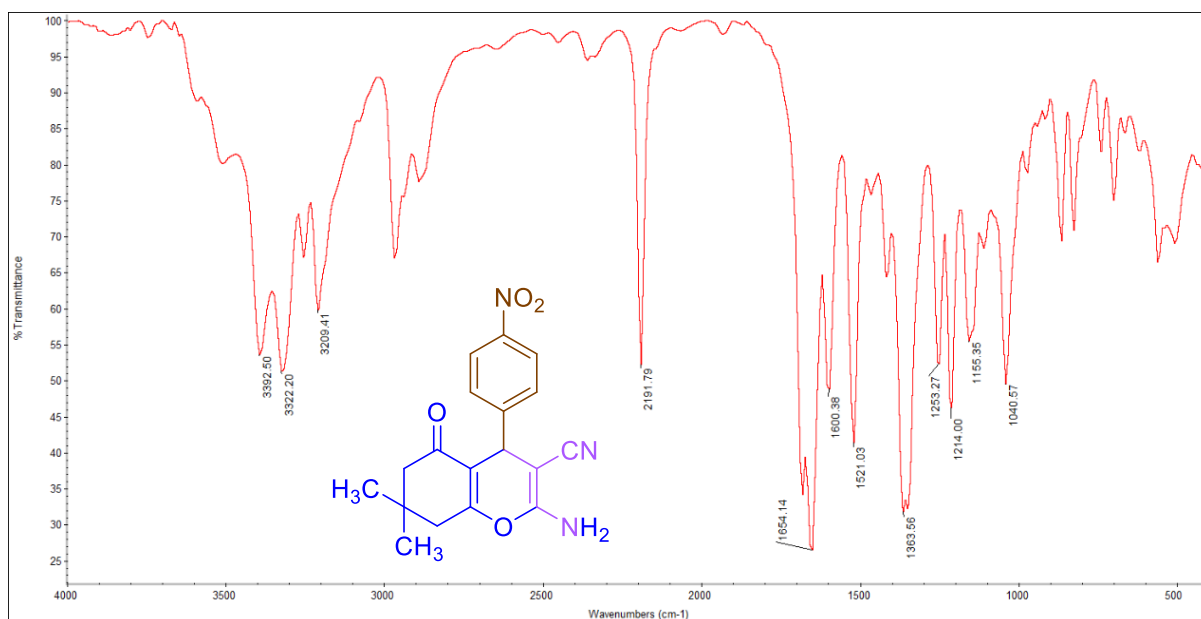

**S2.22. <sup>1</sup>H NMR (400 MHz) spectrum of 2-amino-7,7-dimethyl-4-(4-nitrophenyl)-5-oxo-5,6,7,8-tetrahydro-4H-chromene-3-carbonitrile**

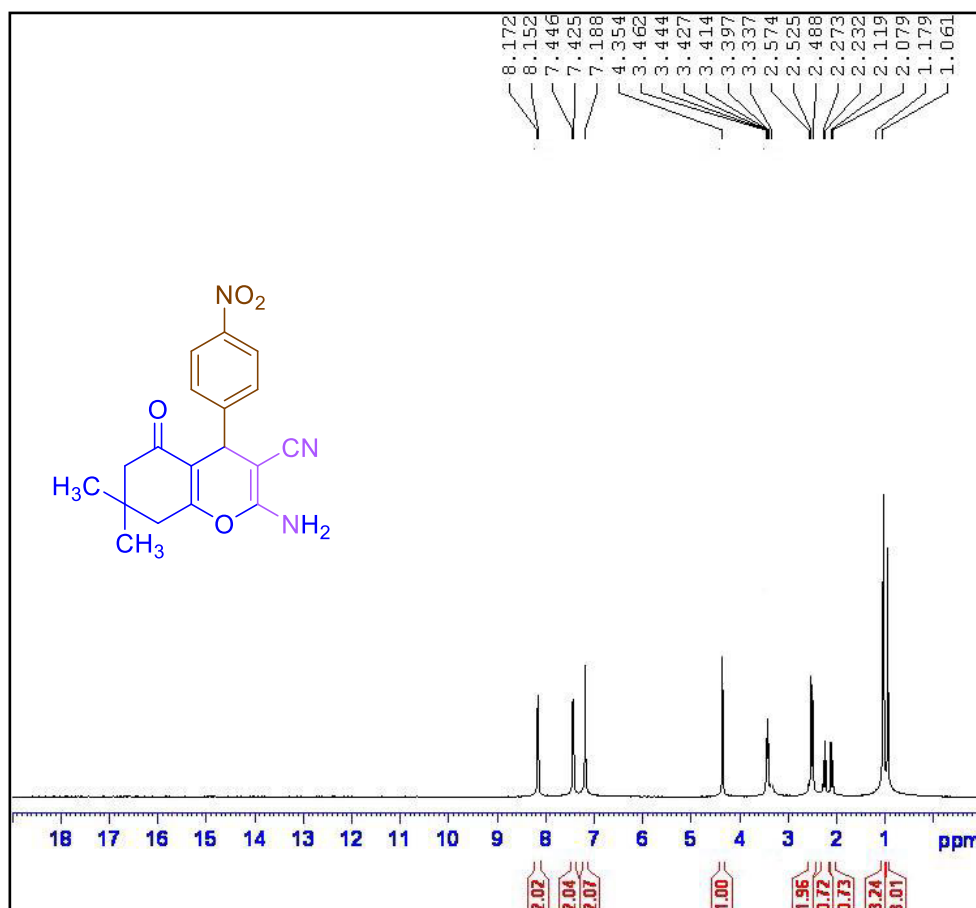

**S2.23. FT-IR spectrum of 2-amino-7,7-dimethyl-4-(3-nitrophenyl)-5-oxo-5,6,7,8-tetrahydro-4H-chromene-3-carbonitrile**

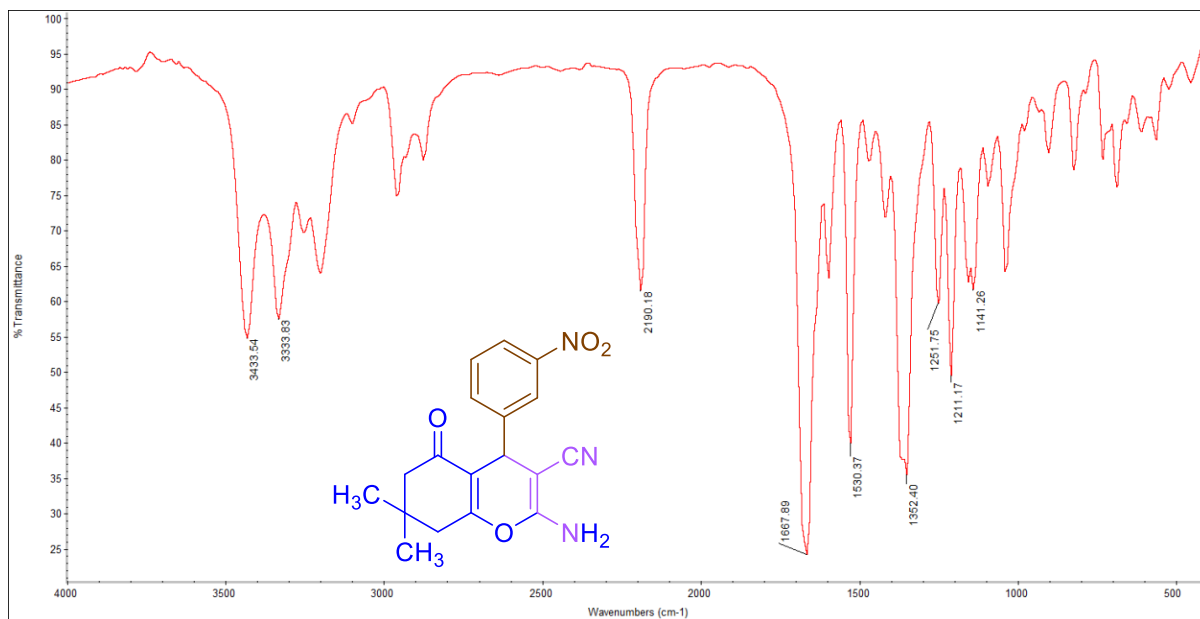

**S2.24. <sup>1</sup>H NMR (400 MHz) spectrum of 2-amino-7,7-dimethyl-4-(3-nitrophenyl)-5-oxo-5,6,7,8-tetrahydro-4H-chromene-3-carbonitrile**

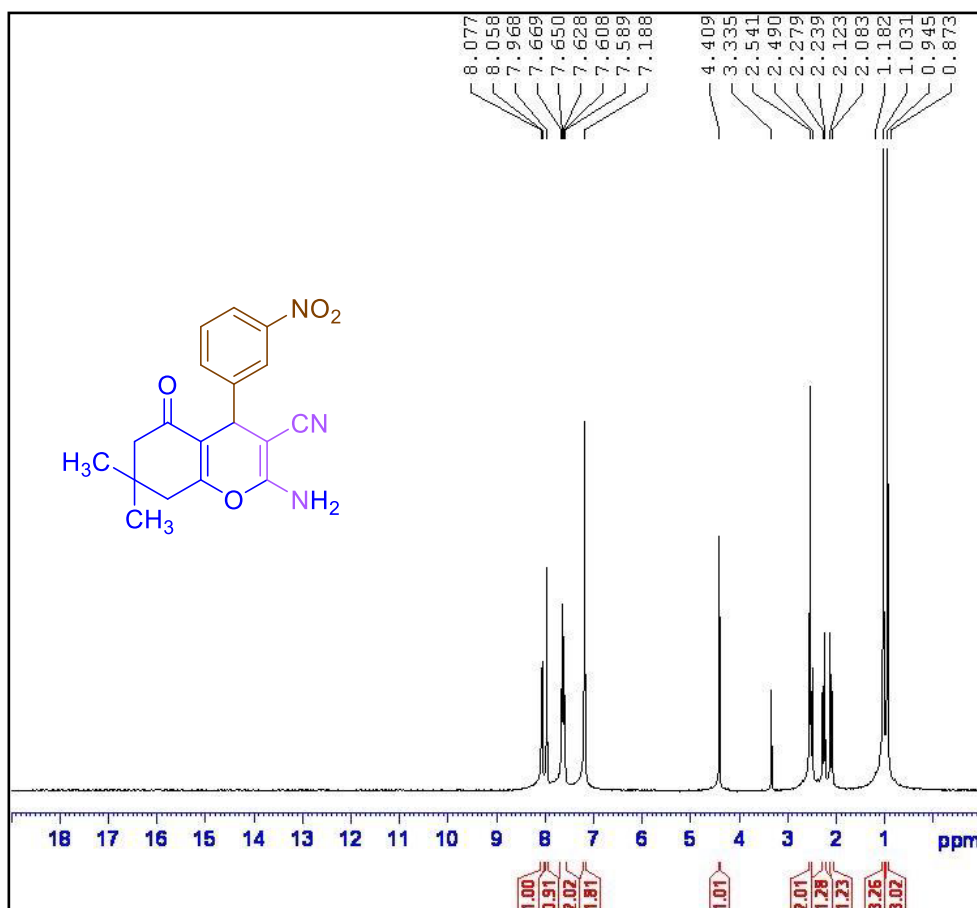

Supplement: d1ra08454b1.pdf [file d1ra08454b1.pdf]
